# Supplementary material for: Realization of red plasmon shifts by the selective etching of Ag nanorods
Source: Royal Society of Chemistry journal article supplement (doi:10.1039/d0ce01362e), 2020-01-01
Supplement: d0ce01362e1.pdf [file d0ce01362e1.pdf]

## Electronic Supplementary Information

### Realization of Red Plasmon Shifts by the Selective Etching of Ag Nanorods

Xingzhong Zhu,<sup>\*a</sup> Juan Xu,<sup>a</sup> Qinru Yun,<sup>a</sup> Changshun Wang,<sup>a</sup> Qifeng Ruan,<sup>b</sup> and Caixia Kan<sup>\*a,c</sup>

<sup>a</sup> College of Science, Nanjing University of Aeronautics and Astronautics, Nanjing 210016, China. E-mail: [cxkan@nuaa.edu.cn](mailto:cxkan@nuaa.edu.cn); [xzzhu@nuaa.edu.cn](mailto:xzzhu@nuaa.edu.cn)

<sup>b</sup> Engineering Product Development, Singapore University of Technology and Design, Singapore 487372, Singapore

<sup>c</sup> Key Laboratory for Intelligent Nano Materials and Devices of the Ministry of Education, Nanjing 210016, China

#### Supplementary figures

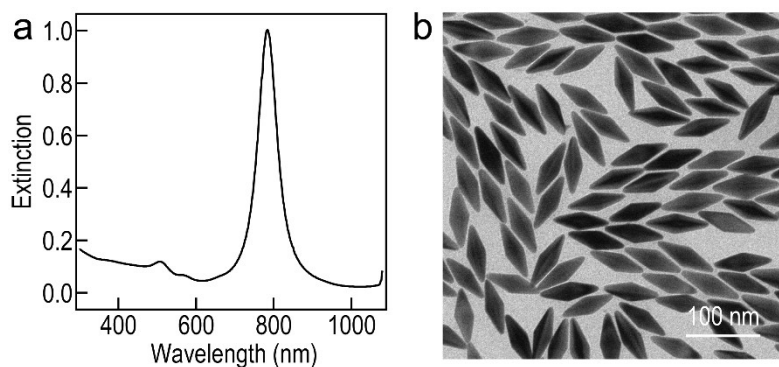

**Fig. S1** (a) Extinction spectrum and (b) TEM image of Au NBPs with average waist width of  $28 \pm 1$  nm and length of  $96 \pm 3$  nm.

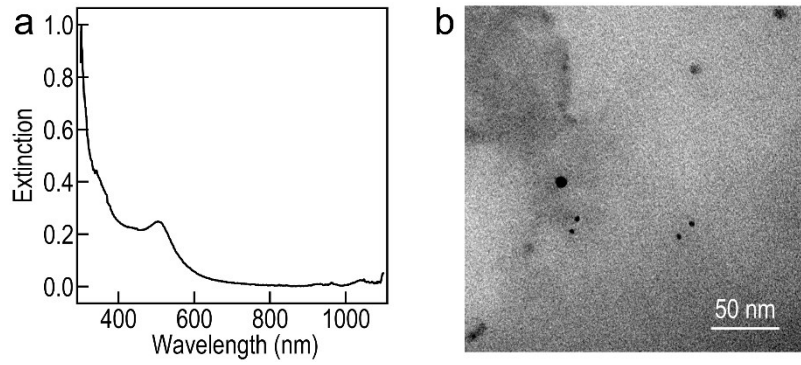

**Fig. S2** (a) Extinction spectrum and (b) TEM image of the supernatant separated from the product.

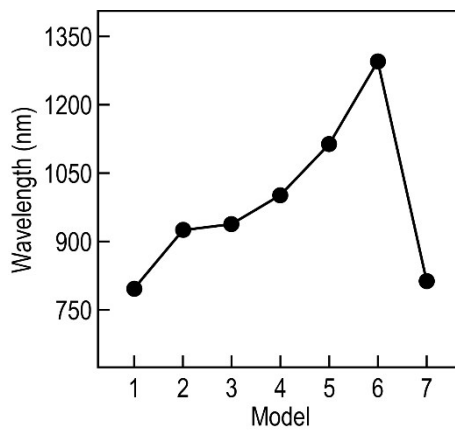

**Fig. S3** Variation of the longitudinal dipolar plasmon wavelength as a function of the model.

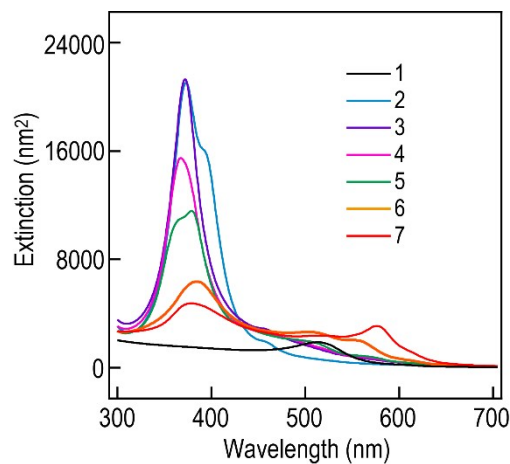

**Fig. S4** Simulated transverse plasmon spectra for the etching process. The models 1–7 are shown in Fig. 4a.

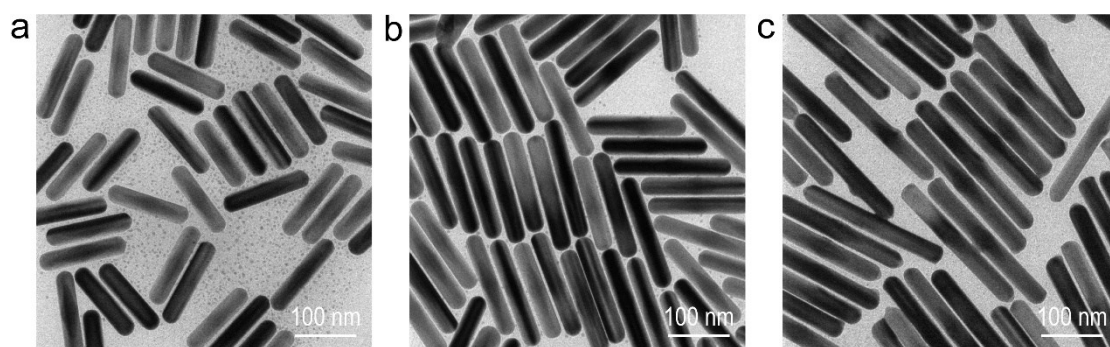

**Fig. S5** (a–c) TEM images of the Ag nanorod samples 2, 3, and 4, respectively.

### Supplementary table

**Table S1.** The diameters and lengths of the Ag nanorods and the corresponding Ag nanobones.

|              | Diameter<br>(nm) | Length<br>(nm) |               | Diameter<br>(nm) | Length<br>(nm) |
|--------------|------------------|----------------|---------------|------------------|----------------|
| Ag nanorod-2 | $136 \pm 5$      | $30 \pm 1$     | Ag nanobone-2 | $133 \pm 5$      | $30 \pm 1$     |
| Ag nanorod-3 | $167 \pm 3$      | $30 \pm 1$     | Ag nanobone-3 | $167 \pm 8$      | $32 \pm 1$     |
| Ag nanorod-4 | $258 \pm 5$      | $30 \pm 1$     | Ag nanobone-4 | $256 \pm 10$     | $31 \pm 1$     |
